# Supplementary material for: DNA Phosphorothioate Modifications Are Widely Distributed in the Human Microbiome
Source: PubMed Central journal article supplement (PMC7464106; doi:10.3390/biom10081175), 2020-08-12
Supplement: biomolecules-10-01175-s001.pdf [file biomolecules-10-01175-s001.pdf]

**Figure S1.** The variation of *dndC*/*sspD* genes. Query genes were from *S. enterica* serovar Cerro 87 (CP008925: 3477655...3481641) and *V. cyclitrophicus* FF75 (NZ\_ATLT01000001: 2194844...2200061) respectively.

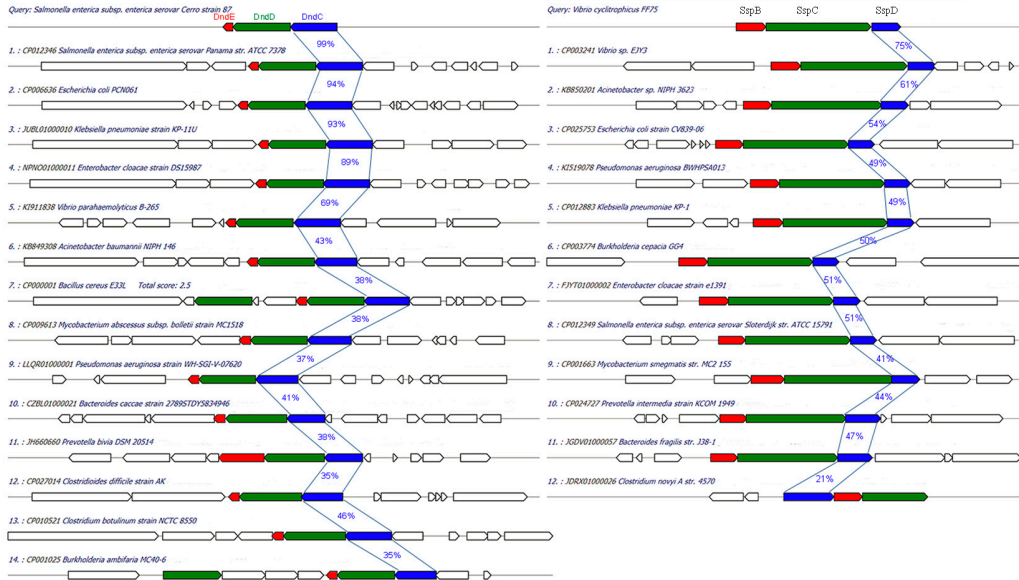

**Figure S2.** Original data for the qualification of PT-linked dinucleotides.

S2-1 Purification of fecal DNA by high performance liquid chromatography

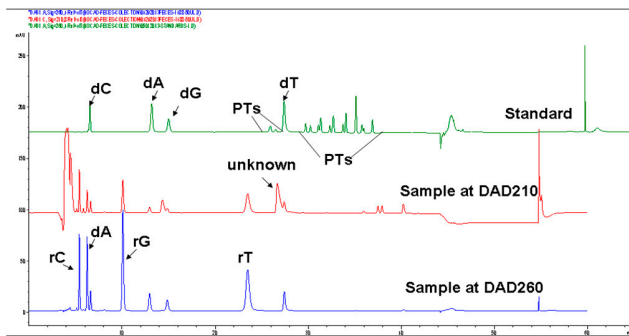

S2-2 The detections of PT-linked dinucleotides by Triple Quadrupole mass spectrometer.

d (C<sub>ps</sub>G) – 16.9 min

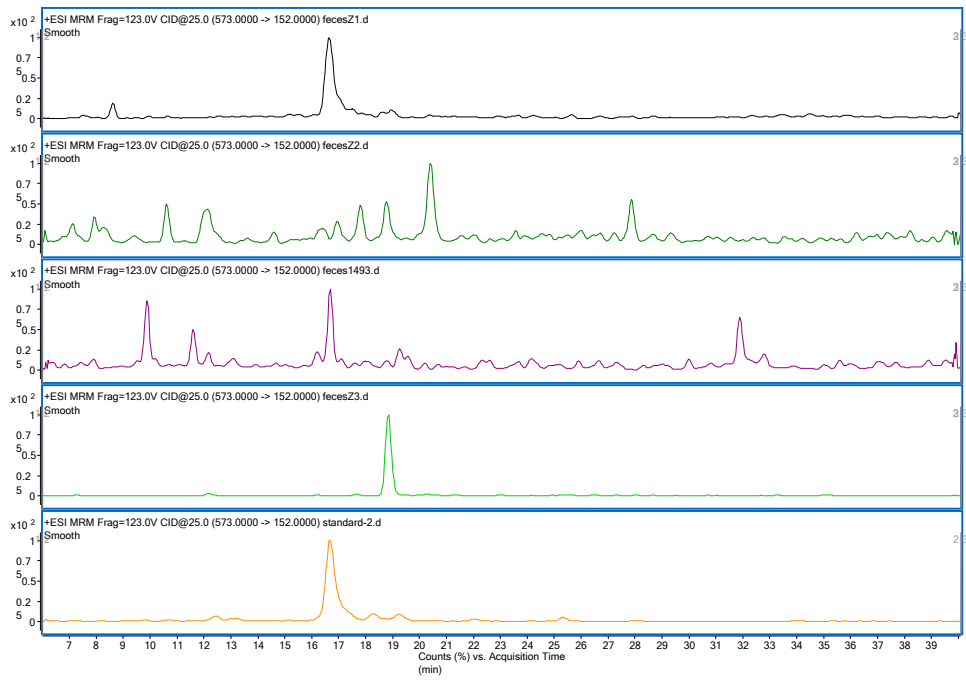

S2-2-1 The detection of C<sub>ps</sub>G in the fecal DNA (fragmentor voltage: 123 V, precursor ion: 573 m/z, product ion: 152 m/z).

d (C<sub>ps</sub>C) - 11.8 min

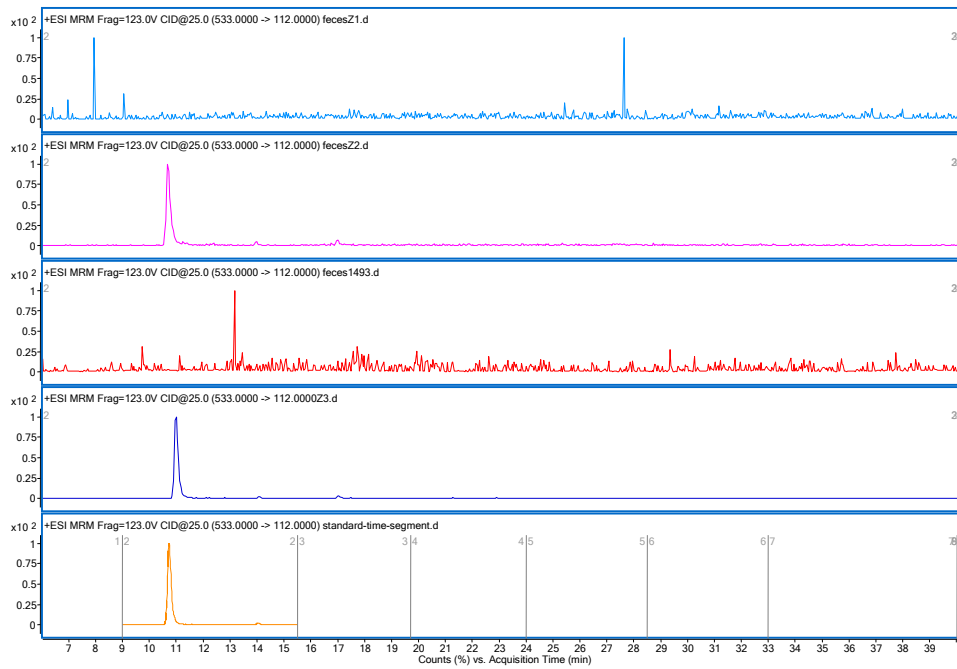

S2-2-2 The detection of C<sub>ps</sub>C in the fecal DNA (fragmentor voltage: 123 V, precursor ion: 533 m/z, product ion: 112 m/z).

d (G<sub>ps</sub>G) - 19 min

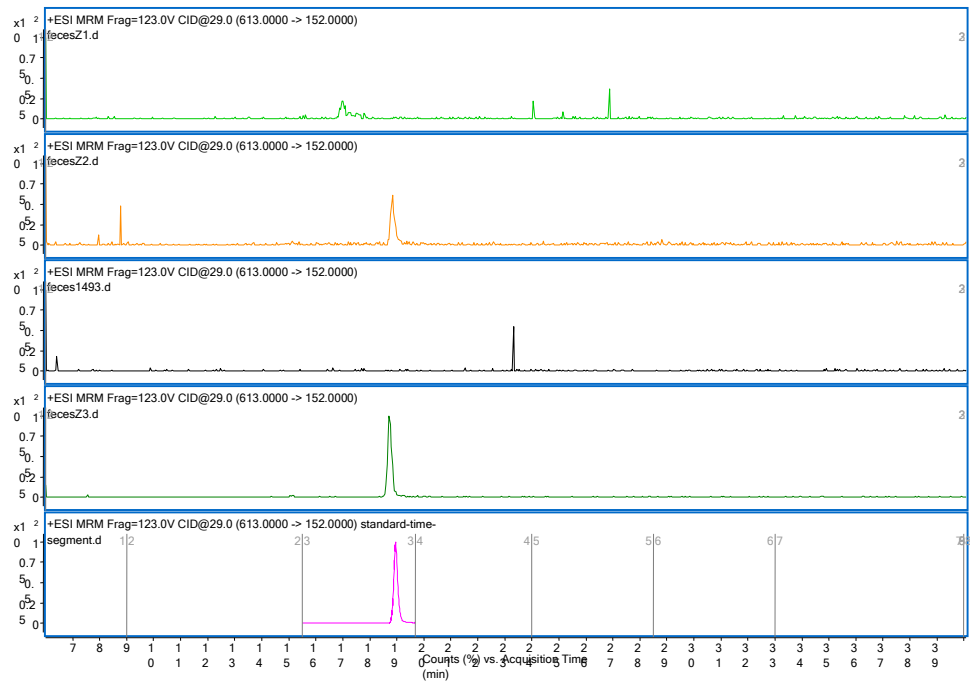

S2-2-3 The detection of G<sub>ps</sub>G in the fecal DNA (fragmentor voltage: 123 V, precursor ion: 613 m/z, product ion: 152 m/z).

d (C<sub>ps</sub>A) - 14.5 min; d (A<sub>ps</sub>C) - 21 min

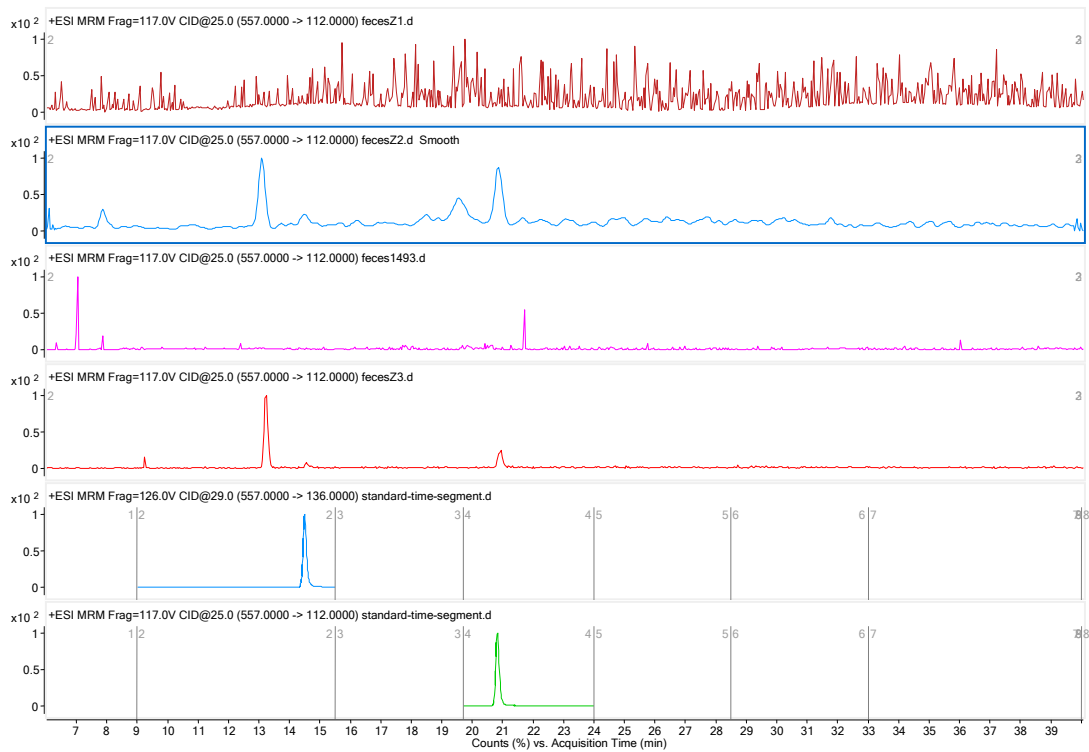

S2-2-4 The detection of C<sub>ps</sub>A / A<sub>ps</sub>C in the fecal DNA (fragmentor voltage: 117 V, precursor ion: 557 m/z, product ion: 112 m/z).

d (C<sub>ps</sub>T) - 17.5 min; d (T<sub>ps</sub>C) - 22.5 min

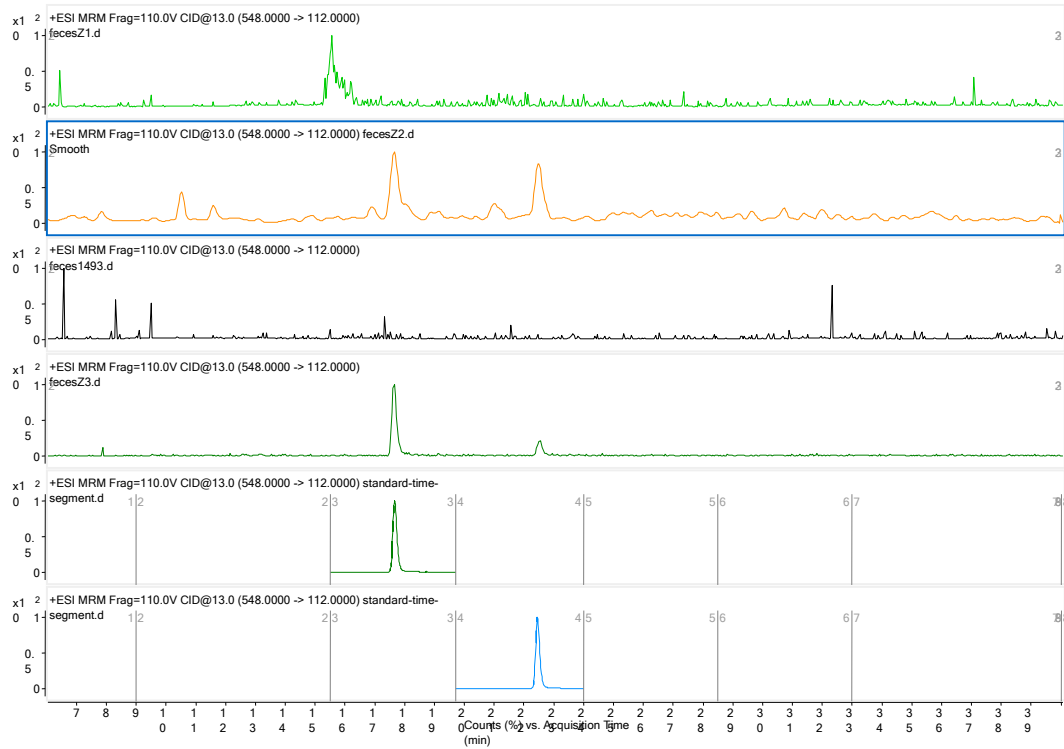

S2-2-5 The detection of C<sub>ps</sub>T / T<sub>ps</sub>C in the fecal DNA (fragmentor voltage: 110 V, precursor ion: 548 m/z, product ion: 112 m/z).

d (A<sub>ps</sub>G) - 19 min

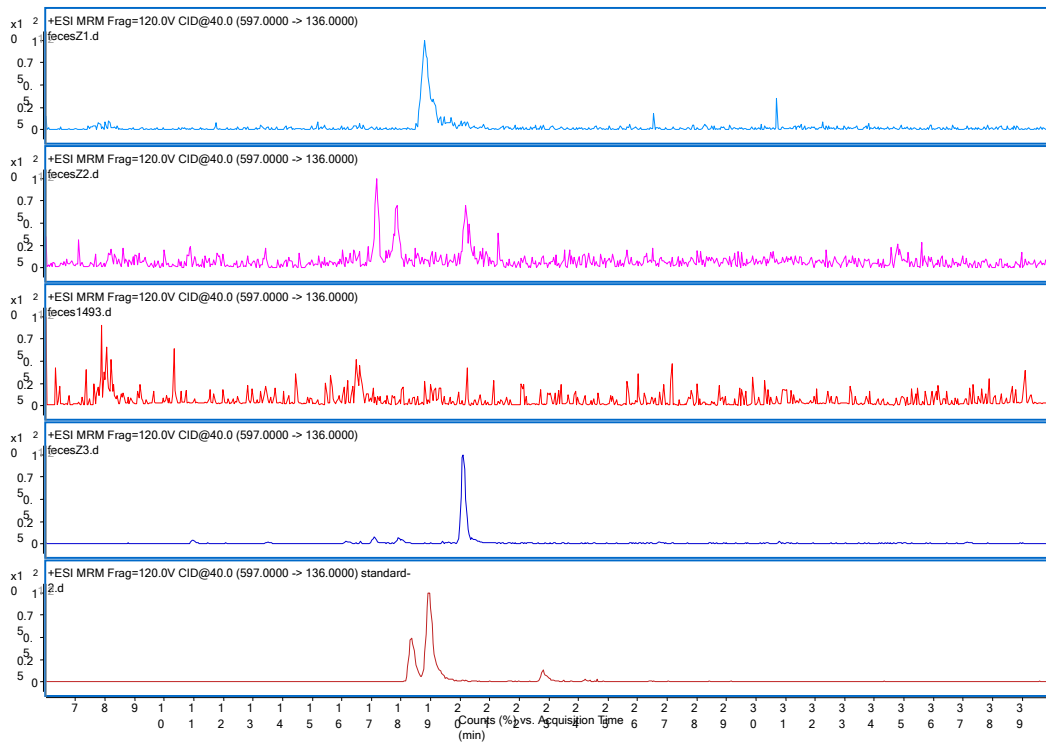

S2-2-6 The detection of A<sub>ps</sub>G in the fecal DNA (fagmentor voltage: 120 V, precursor ion: 597 m/z, product ion: 136 m/z).

d (T<sub>ps</sub>G) - 25.2 min

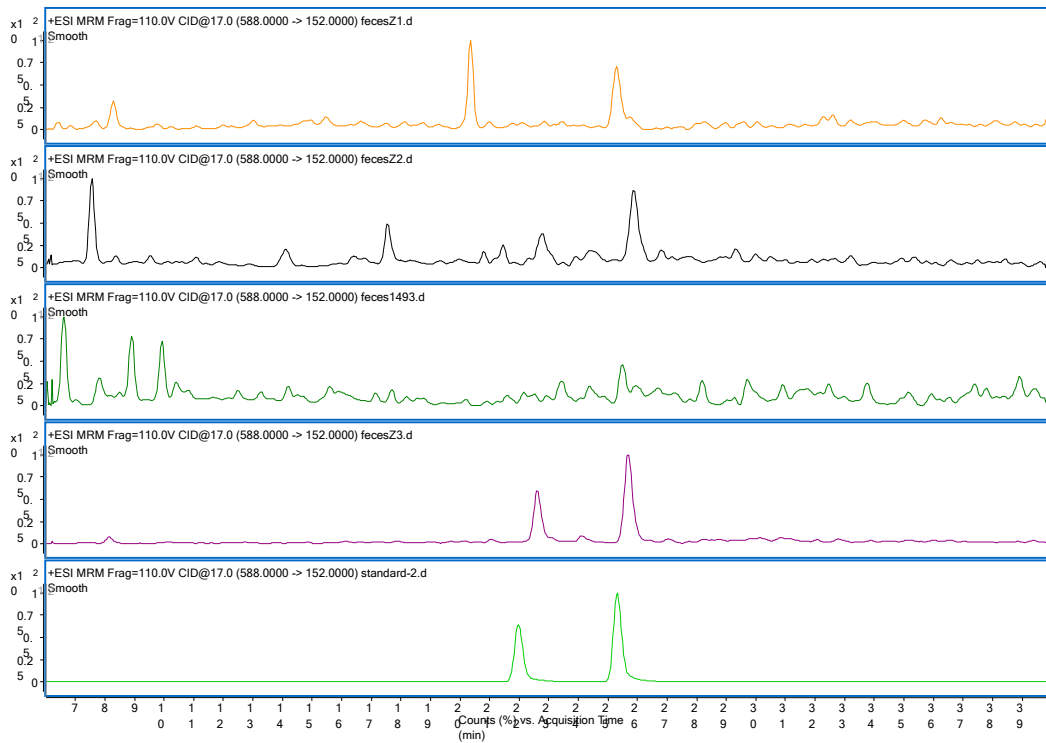

S2-2-7 The detection of T<sub>ps</sub>G in the fecal DNA (fragmentor voltage: 110 V, precursor ion: 588 m/z, product ion: 152 m/z).



d (G<sub>ps</sub>A) - 20.1 min

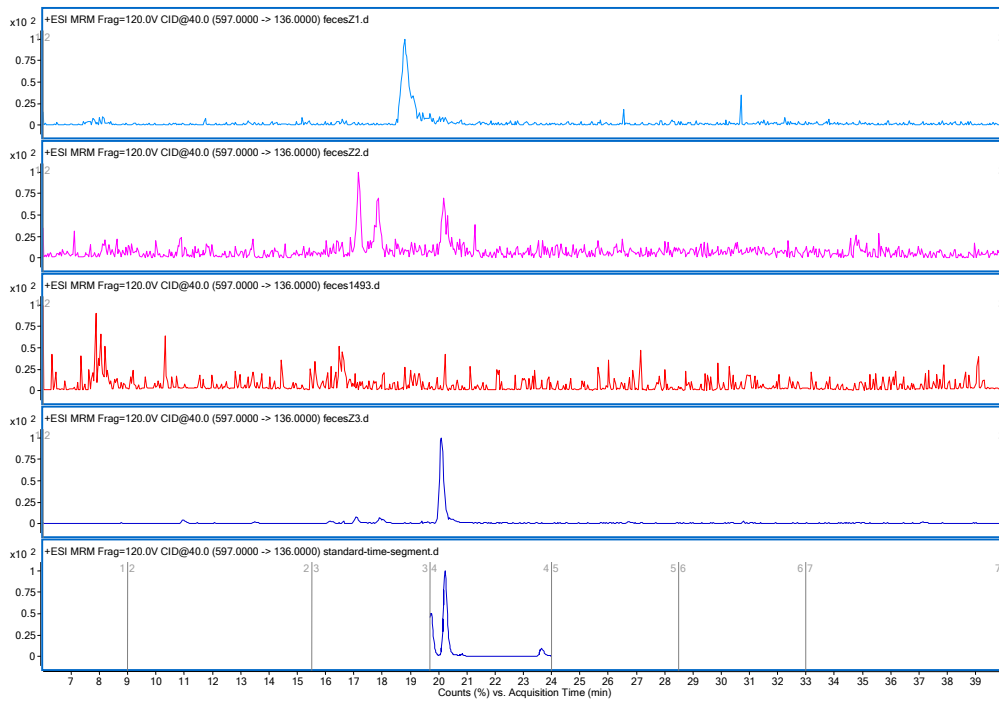

S2-2-8 The detection of G<sub>ps</sub>A in the fecal DNA (fragmentor voltage: 120 V, precursor ion: 597 m/z, product ion: 136 m/z).

d (G<sub>ps</sub>C) - 19 min

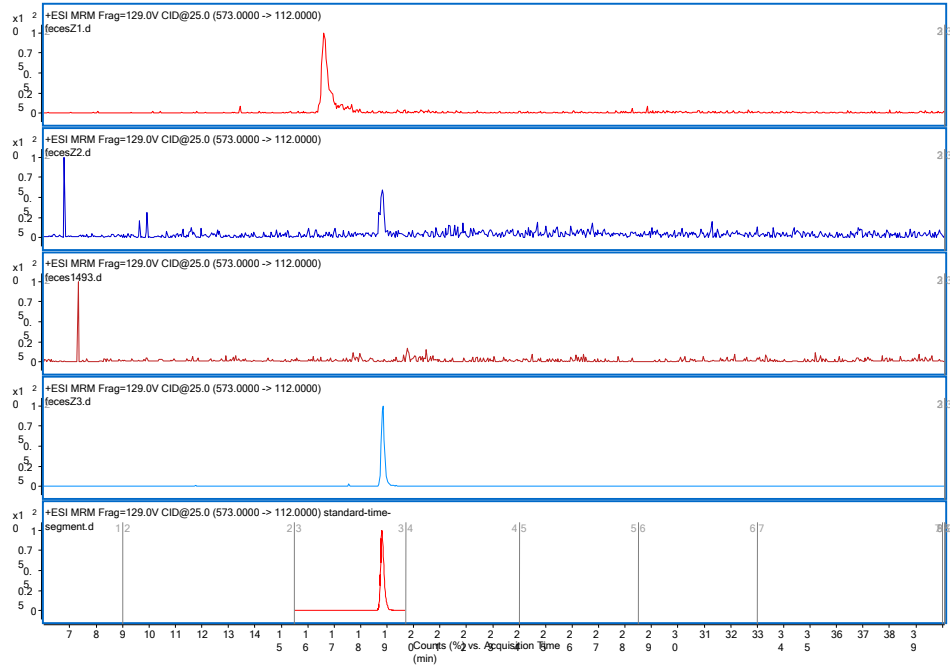

S2-2-9 The detection of G<sub>ps</sub>C in the fecal DNA (fragmentor voltage: 129 V, precursor ion: 573 m/z, product ion: 112 m/z).

d (G<sub>ps</sub>T) - 26 min

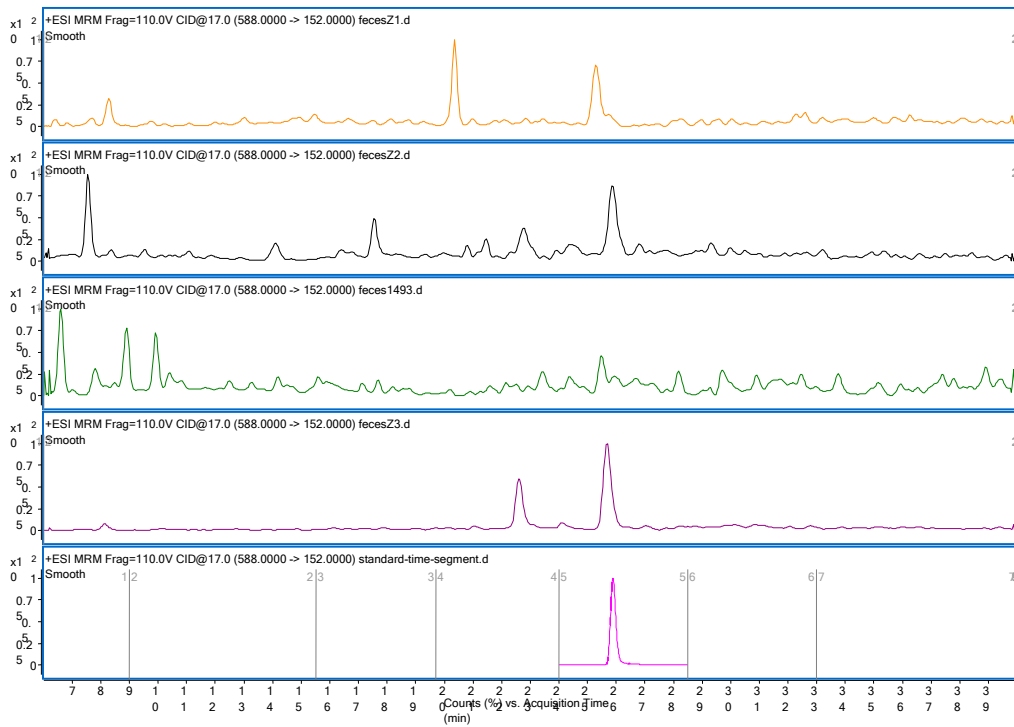

S2-2-10 The detection of G<sub>ps</sub>T in the fecal DNA (fragmentor voltage: 110 V, precursor ion: 588 m/z, product ion: 152 m/z).

d (A<sub>ps</sub>A) - 21.8 min

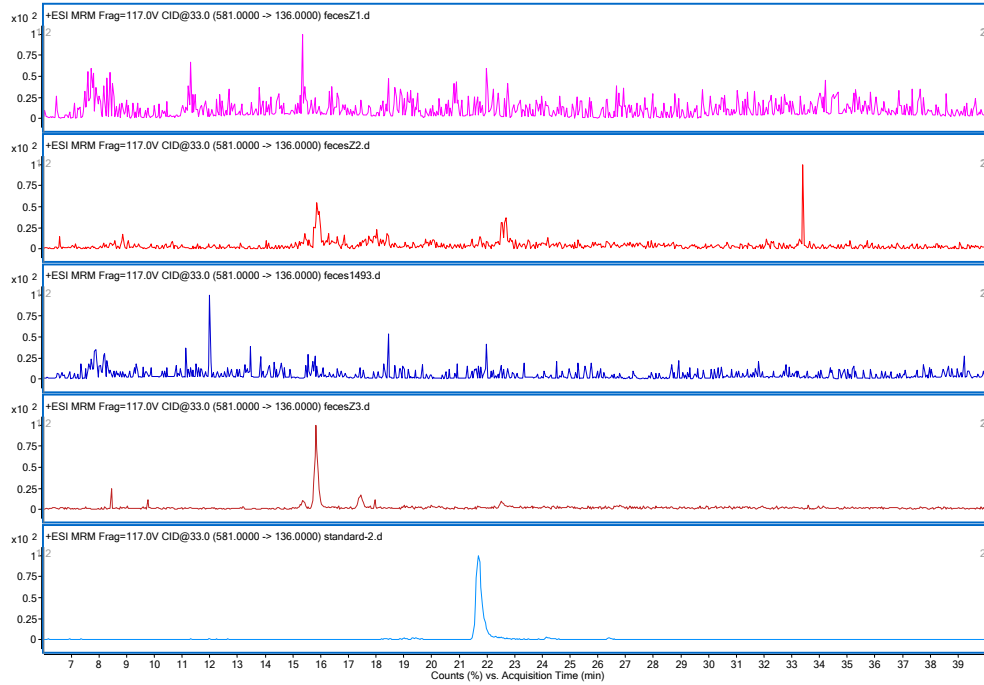

S2-2-11 The detection of A<sub>ps</sub>A in the fecal DNA (fragmentor voltage: 117 V, precursor ion: 581 m/z, product ion: 136 m/z).

d (T<sub>ps</sub>A) - 24 min; d (A<sub>ps</sub>T) - 26.5 min

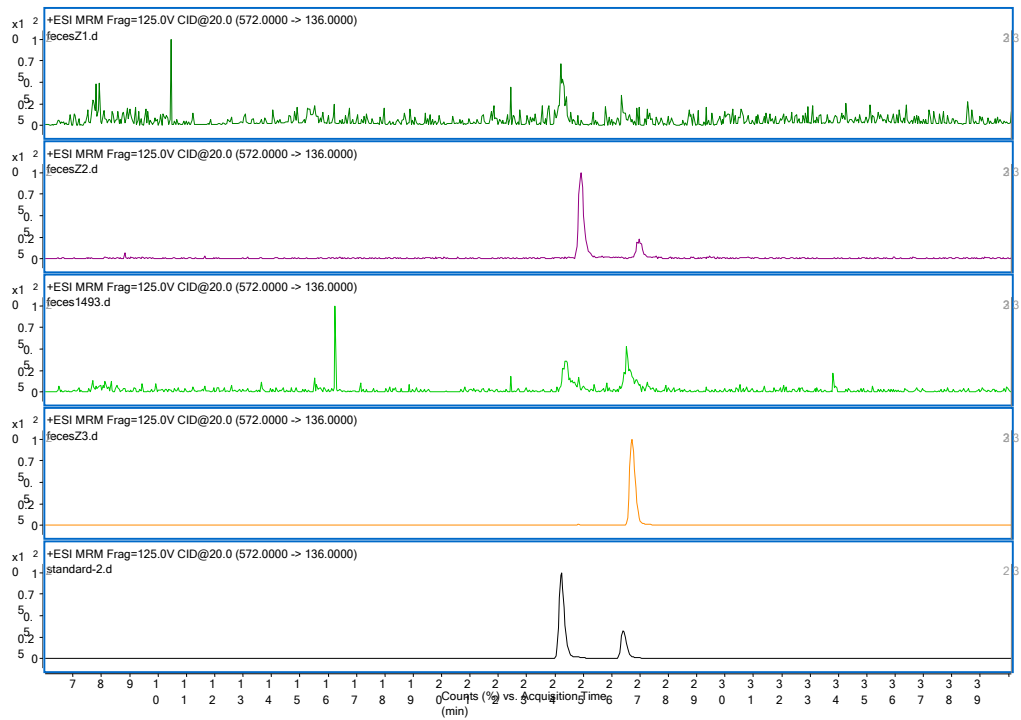

S2-2-12 The detection of T<sub>ps</sub>A / A<sub>ps</sub>T in the fecal DNA (fragmentor voltage: 125 V, precursor ion: 572 m/z, product ion: 136 m/z).

d (C<sub>ps</sub>G) - 16.8 min

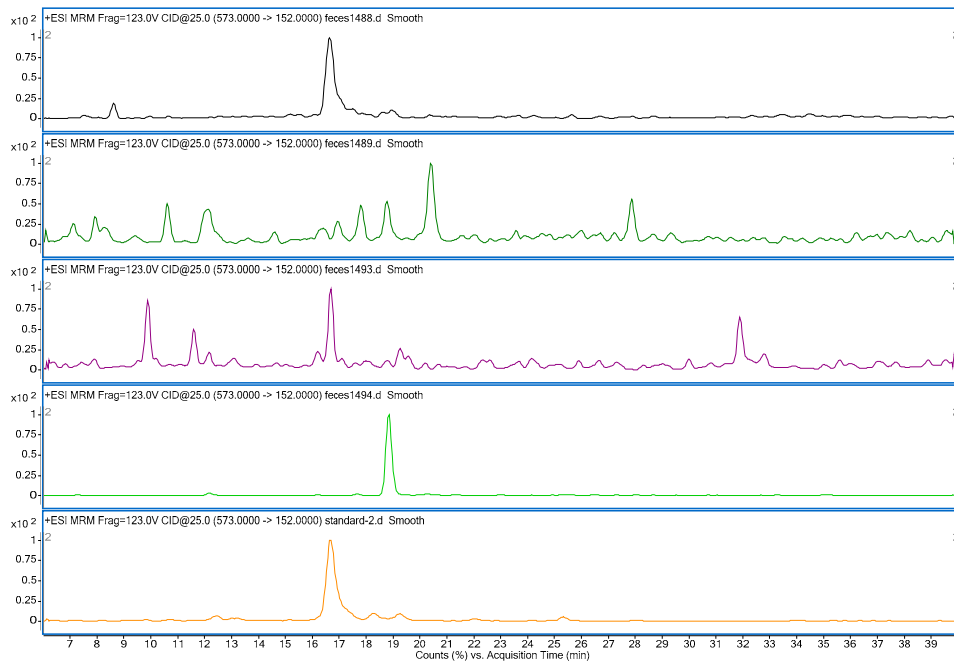

S2-2-13 The detection of C<sub>ps</sub>G in the fecal DNA (fragmentor voltage: 123 V, precursor ion: 573 m/z, product ion: 152 m/z).

d (C<sub>ps</sub>C) - 10.9 min

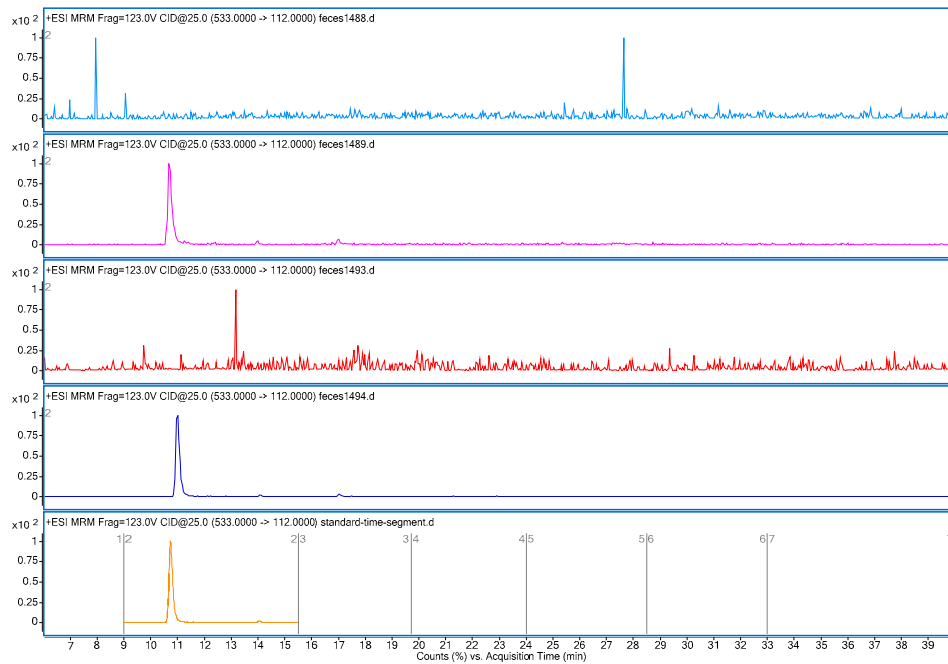

S2-2-14 The detection of C<sub>ps</sub>C in the fecal DNA (fragmentor voltage: 123 V, precursor ion: 533 m/z, product ion: 112 m/z).

d (G<sub>ps</sub>G) -19 min

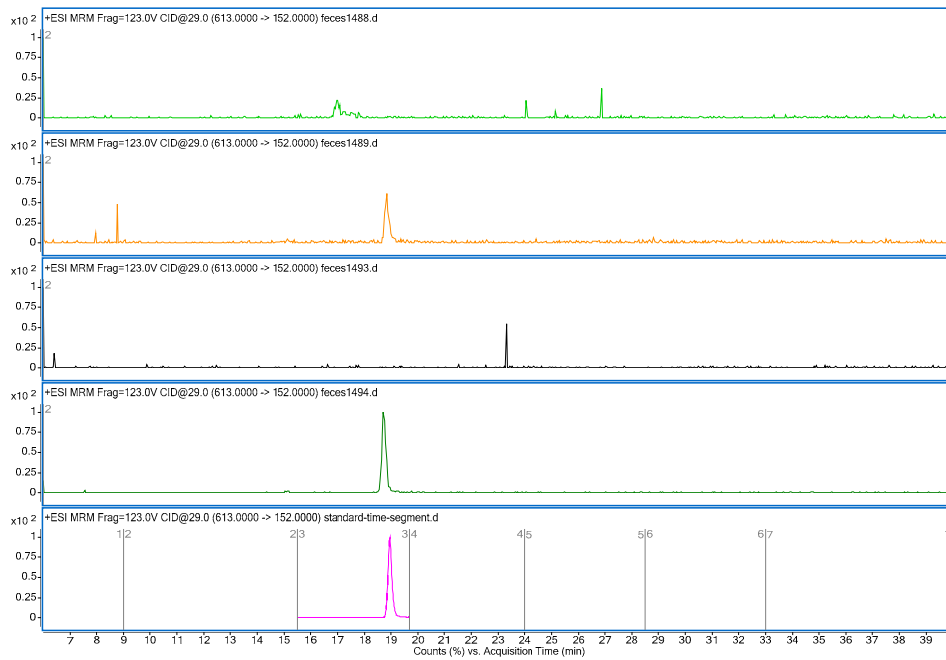

S2-2-15 The detection of G<sub>ps</sub>G in the fecal DNA (fragmentor voltage: 123 V, precursor ion: 613 m/z, product ion: 152 m/z).



d (C<sub>ps</sub>A) -14.5 min; d (A<sub>ps</sub>C) - 21 min

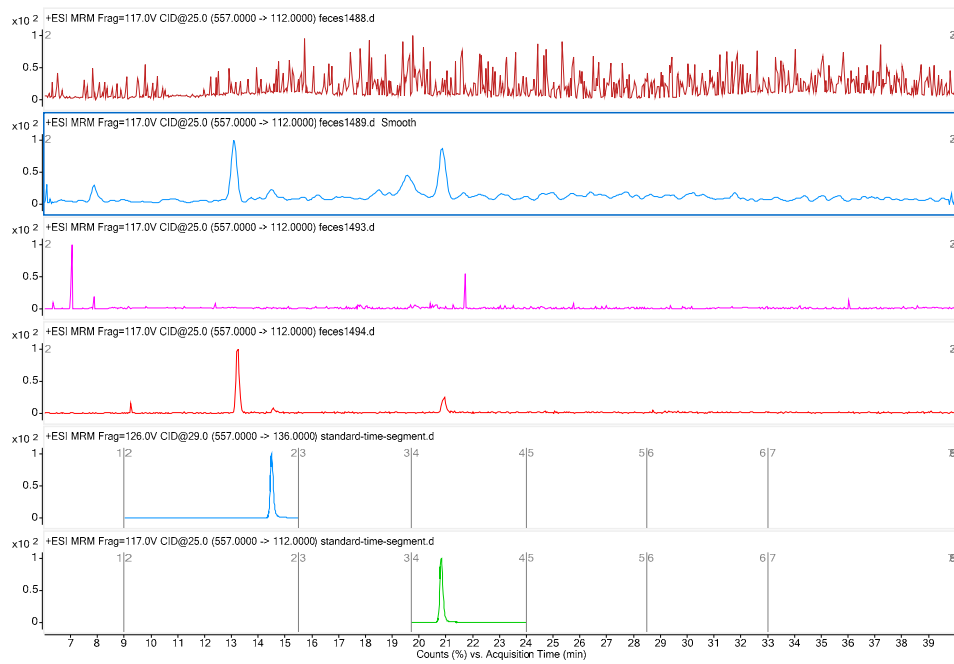

S2-2-16 The detection of C<sub>ps</sub>A / A<sub>ps</sub>C in the fecal DNA (fagmentor voltage: 117 V, precursor ion: 557 m/z, product ion: 112 m/z).

d (C<sub>ps</sub>T) - 17.5 min; d (T<sub>ps</sub>C) - 22.5 min

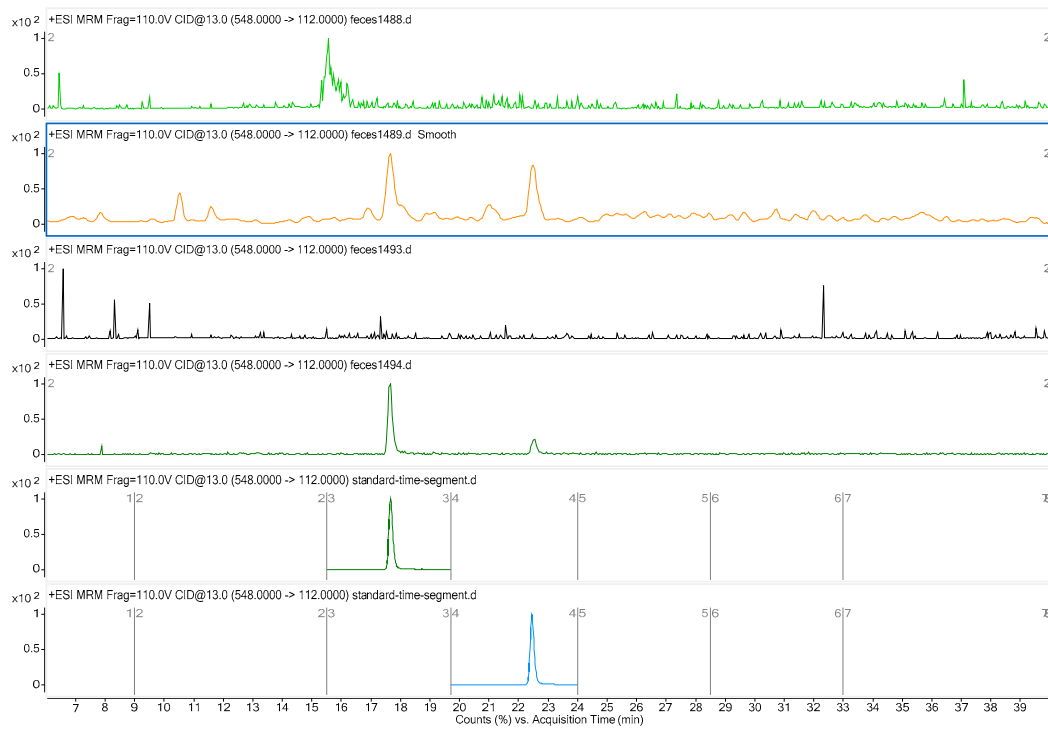

S2-2-17 The detection of C<sub>ps</sub>T / T<sub>ps</sub>C in the fecal DNA (fagmentor voltage: 110 V, precursor ion: 548 m/z, product ion: 112 m/z).

d (A<sub>ps</sub>G) - 19 min

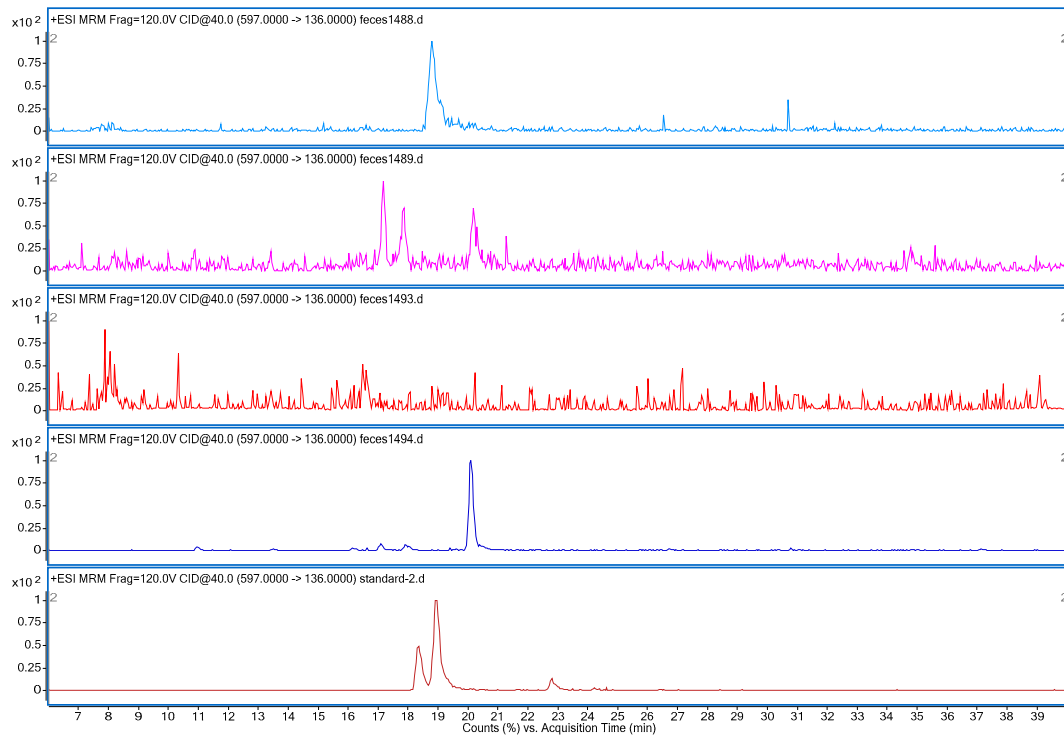

S2-2-18 The detection of A<sub>ps</sub>G in the fecal DNA (fragmentor voltage: 120 V, precursor ion: 597 m/z, product ion: 136 m/z).

d (T<sub>ps</sub>G) - 25.3 min

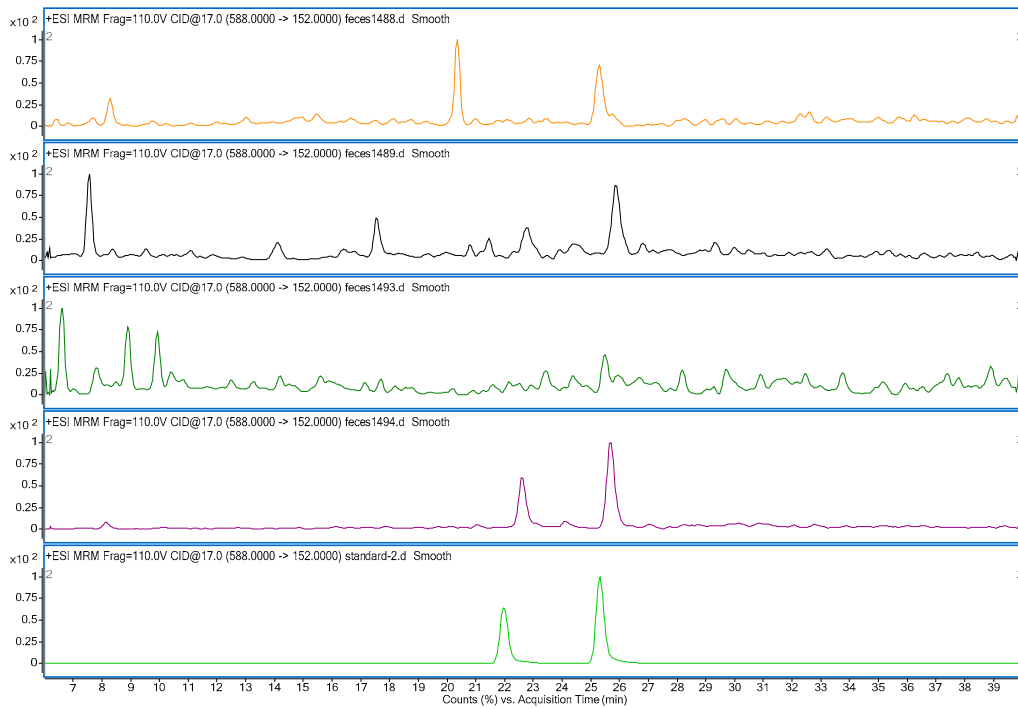

S2-2-19 The detection of T<sub>ps</sub>G in the fecal DNA (fragmentor voltage: 110 V, precursor ion: 588 m/z, product ion: 152 m/z).

d (G<sub>ps</sub>A) - 21.1 min

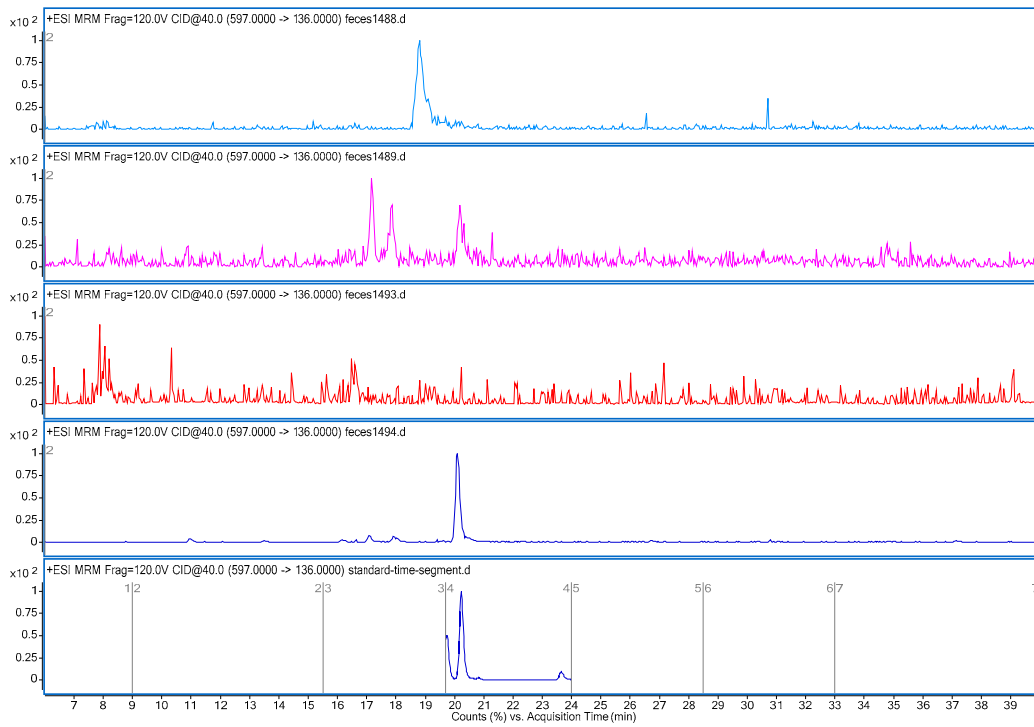

S2-2-20 The detection of G<sub>ps</sub>A in the fecal DNA (fragmentor voltage: 120 V, precursor ion: 597 m/z, product ion: 136 m/z).

d (G<sub>ps</sub>C) - 19 min

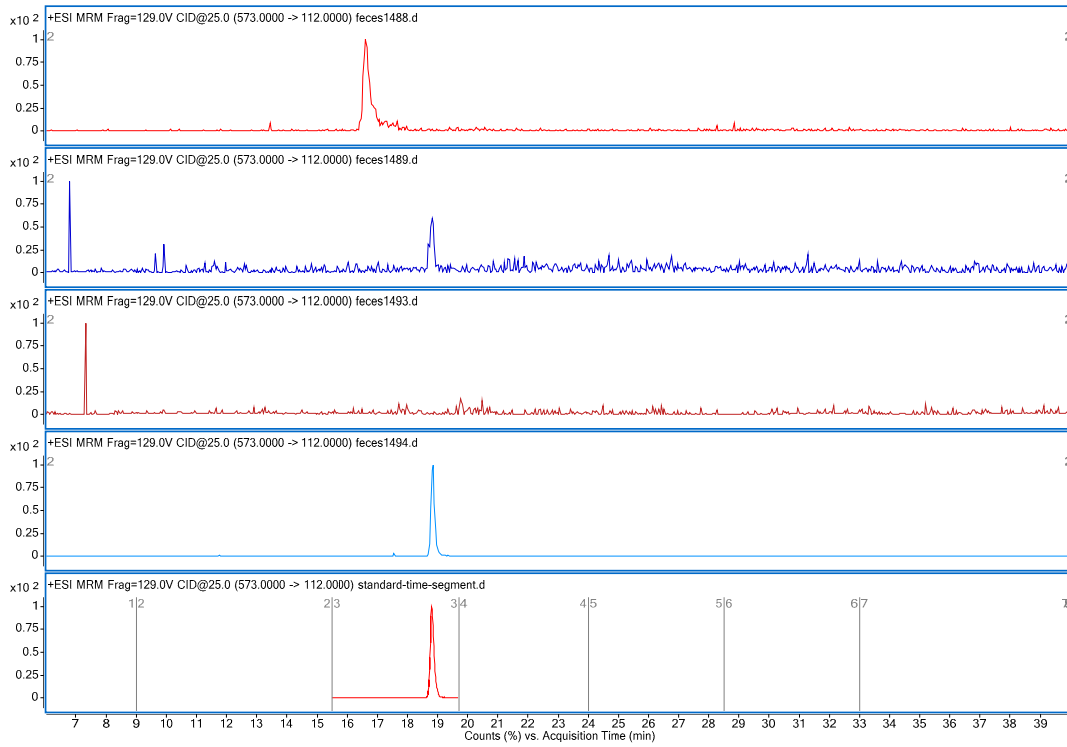

S2-2-21 The detection of G<sub>ps</sub>C in the fecal DNA (fragmentor voltage: 129 V, precursor ion: 573 m/z, product ion: 112 m/z).

d (G<sub>ps</sub>T) - 26 min

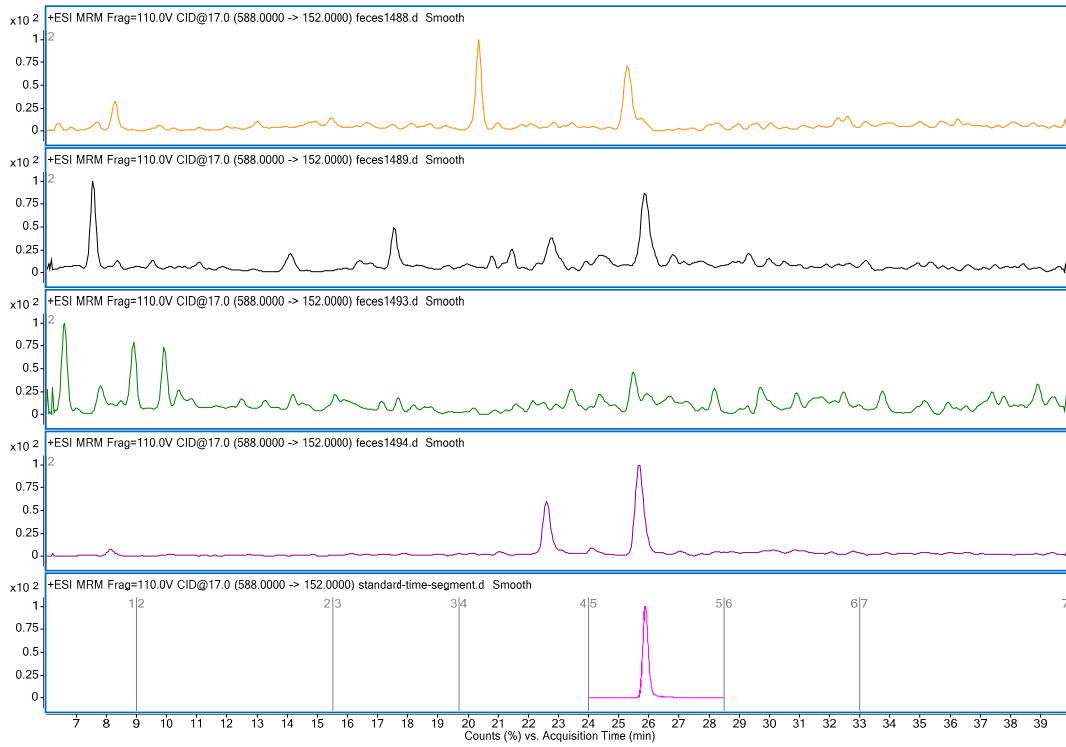

S2-2-22 The detection of G<sub>ps</sub>T in the fecal DNA (fagmentor voltage: 110 V, precursor ion: 588 m/z, product ion: 152 m/z).

d (A<sub>ps</sub>A) - 21.9 min

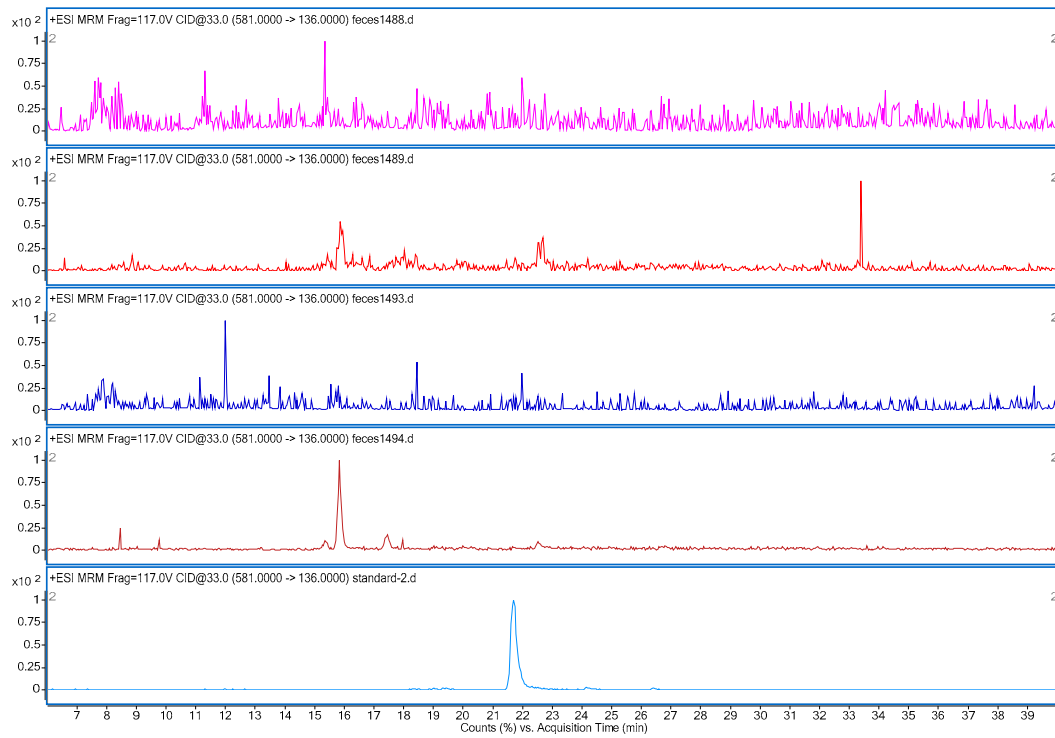

S2-2-23 The detection of A<sub>ps</sub>A in the fecal DNA (fragmentor voltage: 117 V, precursor ion: 581 m/z, product ion: 136 m/z).



d(T<sub>ps</sub>A) - 24 min; d(A<sub>ps</sub>T) - 26.5 min

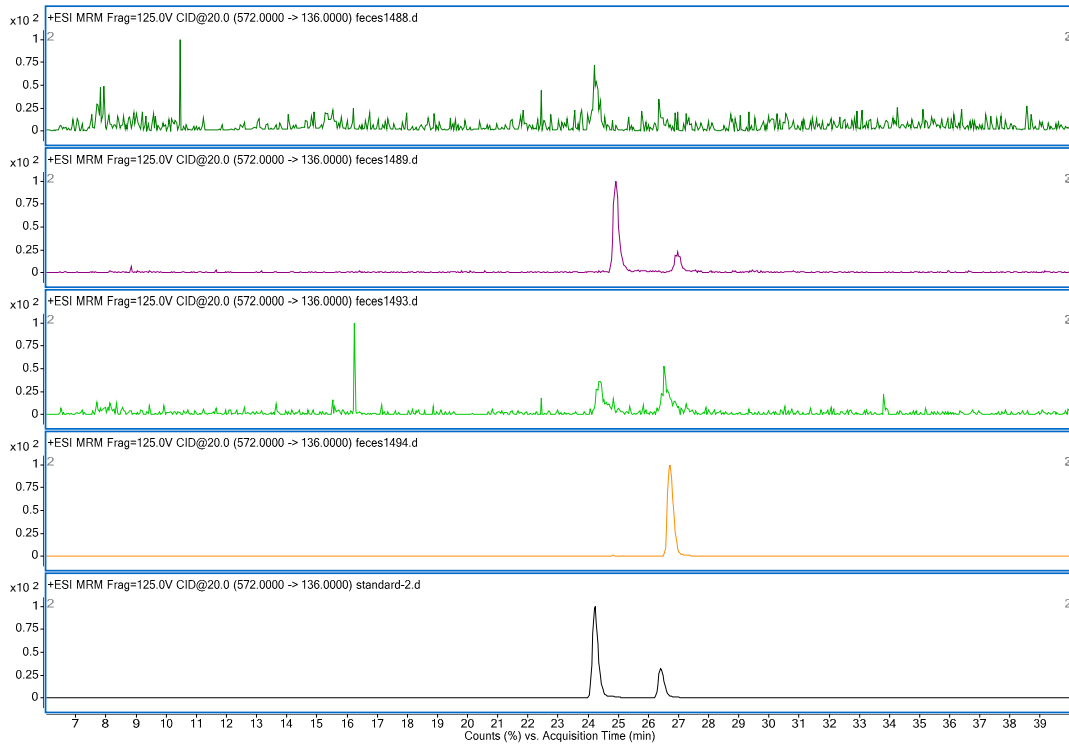

S2-2-24 The detection of T<sub>ps</sub>A/ A<sub>ps</sub>T in the fecal DNA (fragmentor voltage: 125 V, precursor ion: 572 m/z, product ion: 136 m/z).

d (A<sub>ps</sub>C) - 21 min

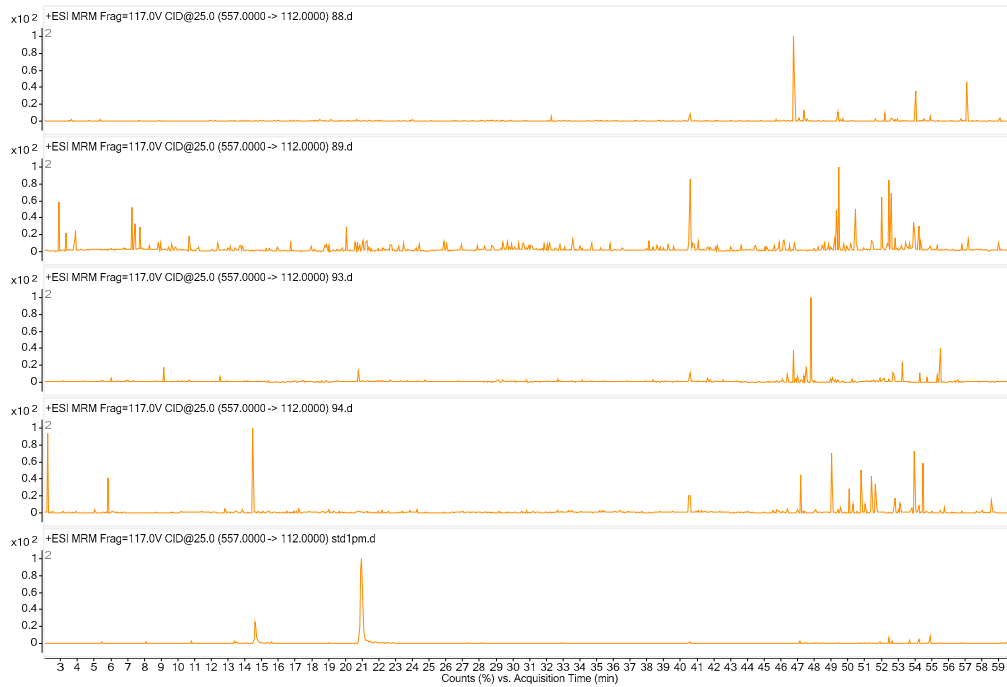

S2-2-25 The detection of A<sub>ps</sub>C in the fecal DNA (fragmentor voltage: 117 V, precursor ion: 557 m/z, product ion: 112 m/z).

d (T<sub>ps</sub>C) - 18 min

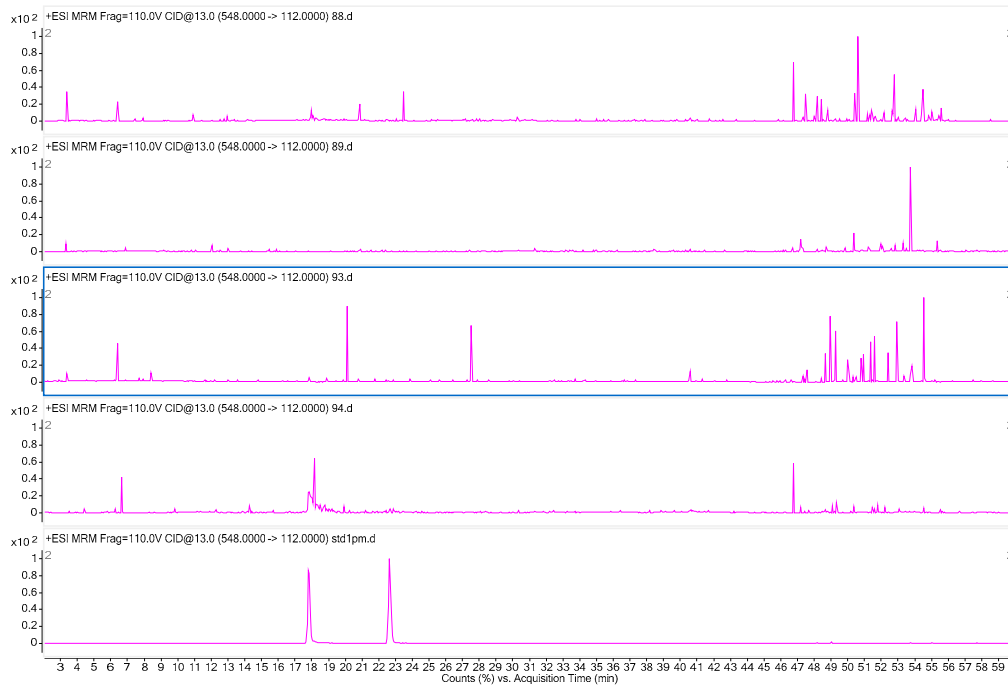

S2-2-26 The detection of T<sub>ps</sub>C in the fecal DNA (fagmentor voltage: 110 V, precursor ion: 548m/z, product ion: 112 m/z).

d (T<sub>ps</sub>T) - 30.4 min

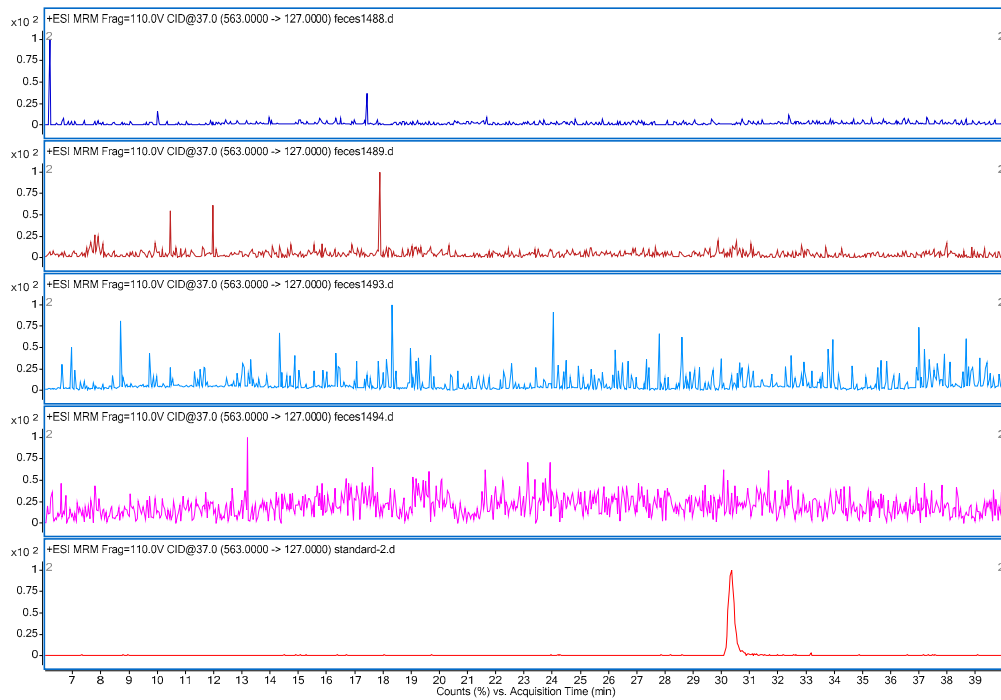

S2-2-27 The detection of T<sub>ps</sub>T in the fecal DNA (fagmentor voltage: 110 V, precursor ion: 563 m/z, product ion: 127 m/z).
